# Supplementary material
Source: PubMed Central journal article supplement (PMC3445438)
Supplement: NIHMS365912-supplement-01.pdf [file NIHMS365912-supplement-01.pdf]

**Supplementary Table 1: Sample size for subgroup analysis in Table 3**

|                               | Total Sample Size |         | Family History of Lung Cancer in 1st Degree Relative |                   | Family History of Lung Cancer in Father |                   | Family History of Lung Cancer in Mother |                   | Family History of Lung Cancer in Sibling |                   |
|-------------------------------|-------------------|---------|------------------------------------------------------|-------------------|-----------------------------------------|-------------------|-----------------------------------------|-------------------|------------------------------------------|-------------------|
|                               | Case              | Control | Affected Cases                                       | Affected Controls | Affected Cases                          | Affected Controls | Affected Cases                          | Affected Controls | Affected Cases                           | Affected Controls |
| <b>Overall</b>                | 243380            | 23305   | 3705                                                 | 1894              | 1456                                    | 958               | 734                                     | 412               | 1859                                     | 655               |
| <b>Proband Gender</b>         |                   |         |                                                      |                   |                                         |                   |                                         |                   |                                          |                   |
| Male                          | 13833             | 12529   | 1893                                                 | 985               | 760                                     | 515               | 341                                     | 211               | 970                                      | 325               |
| Female                        | 10547             | 10776   | 1812                                                 | 909               | 696                                     | 443               | 393                                     | 201               | 889                                      | 330               |
| <b>Proband Ethnicity</b>      |                   |         |                                                      |                   |                                         |                   |                                         |                   |                                          |                   |
| White                         | 20069             | 19303   | 3204                                                 | 1673              | 1270                                    | 850               | 643                                     | 365               | 1598                                     | 581               |
| Black/African American        | 1304              | 1691    | 143                                                  | 92                | 52                                      | 41                | 29                                      | 21                | 72                                       | 36                |
| Asian                         | 1656              | 1282    | 201                                                  | 85                | 81                                      | 43                | 35                                      | 19                | 98                                       | 25                |
| <b>Proband Histology</b>      |                   |         |                                                      |                   |                                         |                   |                                         |                   |                                          |                   |
| Small cell carcinoma          | 2358              | 23305   | 321                                                  | 1894              | 140                                     | 958               | 54                                      | 412               | 160                                      | 655               |
| Non-small cell carcinoma      | 18616             | 23305   | 2939                                                 | 1894              | 1134                                    | 958               | 579                                     | 412               | 1493                                     | 655               |
| Squamous cell carcinoma       | 5781              | 23305   | 813                                                  | 1894              | 308                                     | 958               | 127                                     | 412               | 446                                      | 655               |
| Large cell carcinoma          | 1099              | 23305   | 183                                                  | 1894              | 81                                      | 958               | 35                                      | 412               | 85                                       | 655               |
| Adenocarcinoma                | 9285              | 23305   | 1510                                                 | 1894              | 572                                     | 958               | 333                                     | 412               | 735                                      | 655               |
| BAC                           | 896               | 23305   | 127                                                  | 1894              | 45                                      | 958               | 29                                      | 412               | 69                                       | 655               |
| Non-small cell carcinoma, nos | 1555              | 23305   | 306                                                  | 1894              | 128                                     | 958               | 55                                      | 412               | 158                                      | 655               |
| Carcinoma                     | 1797              | 23305   | 254                                                  | 1894              | 105                                     | 958               | 62                                      | 412               | 107                                      | 655               |
| Carcinoid                     | 347               | 23305   | 38                                                   | 1894              | 13                                      | 958               | 11                                      | 412               | 17                                       | 655               |
| Others/missing                | 1262              | 23305   | 153                                                  | 1894              | 64                                      | 958               | 28                                      | 412               | 82                                       | 655               |
| <b>Proband Smoking Status</b> |                   |         |                                                      |                   |                                         |                   |                                         |                   |                                          |                   |
| Never Smokers                 | 3301              | 8497    | 383                                                  | 654               | 144                                     | 323               | 85                                      | 156               | 177                                      | 217               |
| Ever Smokers                  | 20961             | 14160   | 3319                                                 | 1237              | 1311                                    | 633               | 648                                     | 256               | 1681                                     | 437               |
| Former Smokers                | 7940              | 7836    | 1167                                                 | 699               | 433                                     | 343               | 212                                     | 148               | 643                                      | 257               |
| Current Smokers               | 9877              | 5287    | 1395                                                 | 422               | 622                                     | 239               | 305                                     | 88                | 596                                      | 124               |
| <b>Proband Age at Onset</b>   |                   |         |                                                      |                   |                                         |                   |                                         |                   |                                          |                   |
| <50                           | 3175              | 5100    | 392                                                  | 252               | 232                                     | 169               | 126                                     | 76                | 68                                       | 20                |
| 50+                           | 21205             | 18205   | 3313                                                 | 1642              | 1224                                    | 789               | 608                                     | 336               | 1791                                     | 635               |
